# Supplementary material for: Vascular Calcification Progression Modulates the Risk Associated with Vascular Calcification Burden in Incident to Dialysis Patients
Source: MDPI journal article supplement (doi:10.3390/cells10051091), 2021-05-03
Supplement: s1 [file s1]

## Supplemental material

**Supplemental Figure S1.** Coronary Artery Calcification (CAC) stratification at study inception(A) and according to status at study completion(B).

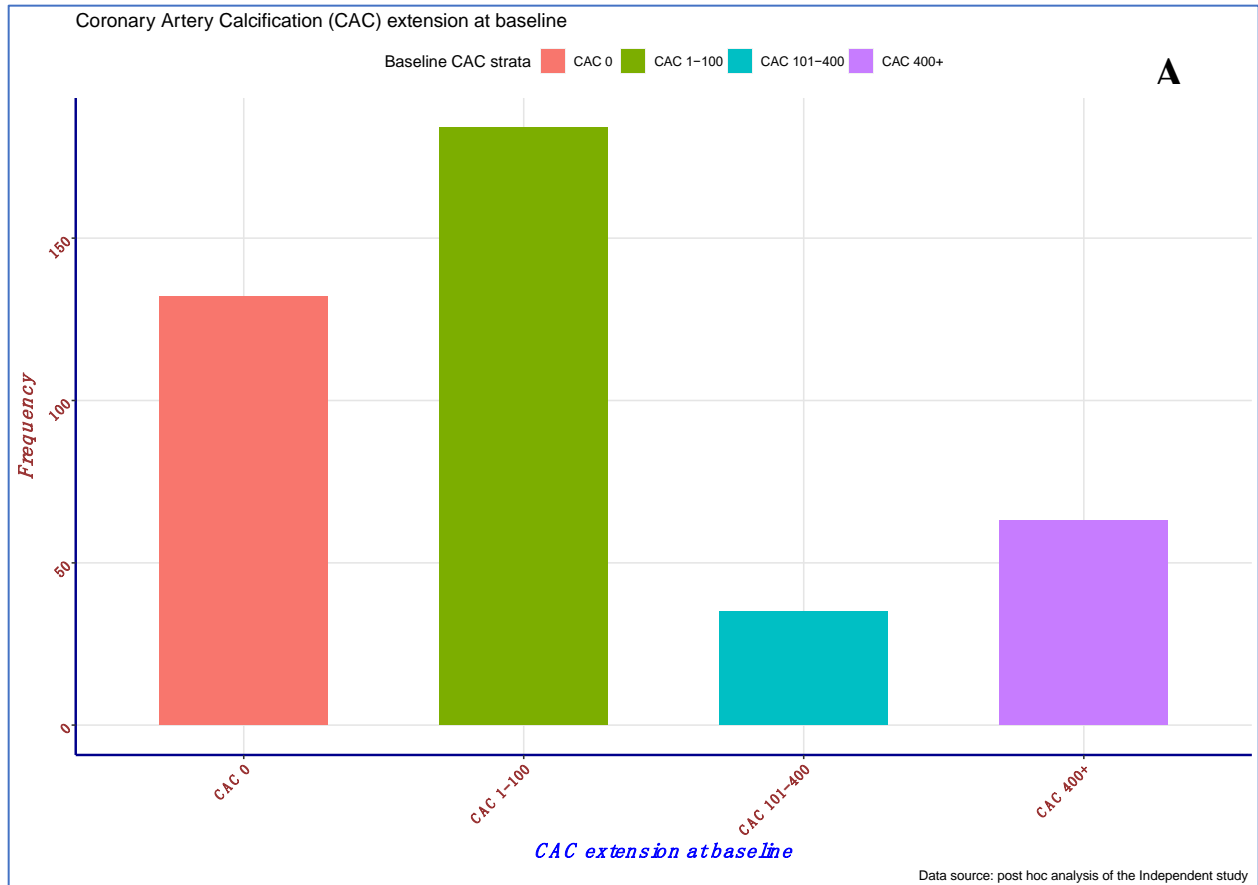

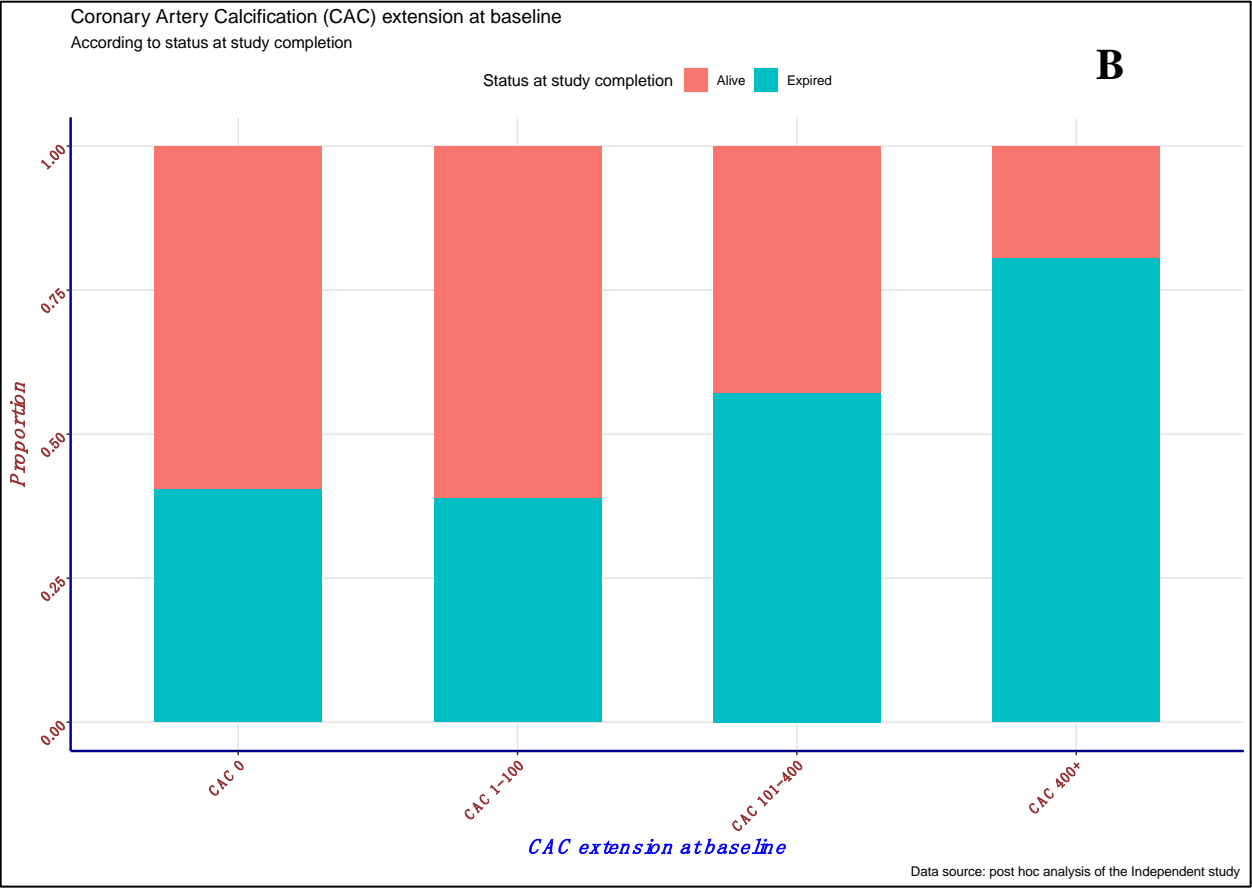

**Supplemental Table S1:** comparisons between subjects enrolled in Independent study included and excluded from current analysis

| Variable                        | Total (n=466)<br>Mean (SD)[n] | Included (n=414)<br>Mean (SD)[n] | Excluded (n=52)<br>Mean (SD)[n] | P-Value           |
|---------------------------------|-------------------------------|----------------------------------|---------------------------------|-------------------|
| Age (years)                     | 65.6 (14.79)[466]             | 65.3 (14.83)[414]                | 68.3 (14.33)[52]                | 0.157             |
| <b>Body Weight (kg)</b>         | <b>69.2 (14.09)[466]</b>      | <b>70.7 (13.72)[414]</b>         | <b>57.5 (11.23)[52]</b>         | <b>&lt;0.0001</b> |
| Male sex                        | 49.1% [229]                   | 48.8% [202]                      | 51.9% [27]                      | 0.781             |
| <b>ASCVD (yes vs no)</b>        | <b>35% [163]</b>              | <b>32.6% [135]</b>               | <b>53.8% [28]</b>               | <b>0.004</b>      |
| <b>Diabetes</b>                 | <b>30.9% [144]</b>            | <b>28.3% [117]</b>               | <b>51.9% [27]</b>               | <b>0.001</b>      |
| Systolic blood pressure (mmHg)  | 137.1 (17.7)[466]             | 137 (18.01)[414]                 | 138 (15.15)[52]                 | 0.663             |
| Diastolic blood pressure (mmHg) | 76 (9.37)[466]                | 76.1 (9.13)[414]                 | 75.2 (11.16)[52]                | 0.585             |
| CAC Agatston score (unit)       | 256.9 (715.61)[466]           | 273.7 (728.84)[414]              | 123.4 (589.07)[52]              | 0.096             |
| <b>CAC strata</b>               | <b>n=466</b>                  | <b>n=414</b>                     | <b>n=52</b>                     | <b>&lt;0.0001</b> |
| <b>CAC 0</b>                    | <b>29.4% [137]</b>            | <b>31.9% [132]</b>               | <b>9.6% [5]</b>                 |                   |
| <b>CAC 1-100</b>                | <b>48.3% [225]</b>            | <b>44.4% [184]</b>               | <b>78.8% [41]</b>               |                   |
| <b>CAC 101-400</b>              | <b>8.6% [40]</b>              | <b>8.5% [35]</b>                 | <b>9.6% [5]</b>                 |                   |
| <b>CAC 400+</b>                 | <b>13.7% [64]</b>             | <b>15.2% [63]</b>                | <b>1.9% [1]</b>                 |                   |
| Pulse Wave Velocity (m/sec)     | 8.8 (2.7)[466]                | 8.7 (2.49)[414]                  | 9.3 (3.99)[52]                  | 0.278             |
| LVMI (g/cm <sup>2</sup> )       | 150.4 (46.96)[466]            | 149.3 (45.66)[414]               | 159 (56.04)[52]                 | 0.235             |
| QTc (msec)                      | 407.1 (33.04)[466]            | 407.6 (32.73)[414]               | 402.8 (35.44)[52]               | 0.358             |
| QTd (msec)                      | 26.8 (11.5)[466]              | 26.6 (11.66)[414]                | 27.7 (10.13)[52]                | 0.486             |

**Table legend:** ASCVD: atherosclerotic cardiovascular disease defined if any of the following clinical data was reported: history of cerebrovascular disease; peripheral vascular disease; angina pectoris; history of myocardial infarction; aortic aneurysm; history of percutaneous coronary angioplasty with or without stenting; LVMI: Left ventricular mass index; CAC: coronary artery calcification

**Supplemental Table S2:** Independent predictors of all-cause mortality in the study cohort 1. Variables forced into the Cox model were selected based on available evidence.

| Predictors of all-cause mortality (Cox model) - All subjects n =414 (106 fatalities) |              |                         |                |                 |
|--------------------------------------------------------------------------------------|--------------|-------------------------|----------------|-----------------|
| Model 4 adjusted for model 3 + use of calcium free phosphate binder                  |              |                         |                |                 |
|                                                                                      | HR           | 95% Confidence interval |                | Pr(> z )        |
|                                                                                      |              | Lower Boundary          | Upper Boundary |                 |
| <b>Baseline CAC score (log CAC +1) per log increase</b>                              | <b>1.129</b> | <b>1.0114</b>           | <b>1.2596</b>  | <b>0.03055</b>  |
| CAC progression (yes vs no)                                                          | 1.9591       | 0.9214                  | 4.1652         | 0.08058         |
| <b>Age (years)</b>                                                                   | <b>1.023</b> | <b>1.0059</b>           | <b>1.0399</b>  | <b>0.00797</b>  |
| <b>Diabetes (yes vs no)</b>                                                          | <b>6.285</b> | <b>4.0267</b>           | <b>9.8091</b>  | <b>5.84E-16</b> |
| ASCVD (yes vs no)                                                                    | 1.2216       | 0.8158                  | 1.8294         | 0.3312          |
| Systolic Blood Pressure (mmHg)                                                       | 1.0107       | 0.9992                  | 1.0223         | 0.06747         |
| <b>Pulse Wave Velocity (m/sec)</b>                                                   | <b>1.114</b> | <b>1.0429</b>           | <b>1.1906</b>  | <b>0.00136</b>  |
| LVMI (g/cm <sup>2</sup> )                                                            | 1.0029       | 0.9977                  | 1.0081         | 0.27687         |
| <b>Calcium-free phosphate binder vs calcium-containing phosphate binders</b>         | <b>0.211</b> | <b>0.1257</b>           | <b>0.3551</b>  | <b>4.44E-09</b> |
| Interaction term (baseline CAC)*(CAC progression)                                    | 0.96         | 0.8255                  | 1.1164         | 0.59595         |

**Table legend:** ASCVD atherosclerotic cardiovascular disease defined if any of the following clinical data was reported: history of cerebrovascular disease; peripheral vascular disease; angina pectoris; history of myocardial infarction; aortic aneurysm; history of percutaneous coronary angioplasty with or without stenting; LVMI: Left ventricular mass index; CAC: coronary artery calcification; HR: Hazard ratio.

**Supplemental Table S3:** The most parsimonious model (selected via a stepwise method) to predict all-cause mortality.

| Variable                                         | HR            | lower .95     | upper .95    | Pr(> z )       |     |
|--------------------------------------------------|---------------|---------------|--------------|----------------|-----|
| <b>log(CAC score) per 1 log increase</b>         | <b>1.730</b>  | <b>1.447</b>  | <b>2.069</b> | <b>0.000</b>   | *** |
| <b>Pulse Wave velocity (m/sec)</b>               | <b>1.0968</b> | <b>1.0082</b> | <b>1.193</b> | <b>0.03158</b> | *   |
| Age (years)                                      | 1.0167        | 0.9967        | 1.037        | 0.10152        |     |
| <b>Diabetes, yes vs no</b>                       | <b>3.1042</b> | <b>1.4553</b> | <b>6.622</b> | <b>0.00338</b> | **  |
| ASCVD, yes vs no                                 | 0.5692        | 0.282         | 1.149        | 0.11584        |     |
| Systolic blood pressure (mmHg)                   | 1.0103        | 0.9966        | 1.024        | 0.13968        |     |
| Use of calcium based phosphate binder, yes vs no | 2.6029        | 0.8045        | 8.421        | 0.11029        |     |
| Use of Calcium channel blockers                  | 1.6822        | 0.9516        | 2.974        | 0.07356        | .   |

**Table legend:** ASCVD atherosclerotic cardiovascular disease defined if any of the following clinical data was reported: history of cerebrovascular disease; peripheral vascular disease; angina pectoris; history of myocardial infarction; aortic aneurysm; history of percutaneous coronary angioplasty with or without stenting.
